# Supplementary material for: Coastal vulnerability assessment: through regional to localdownscaling of wave characteristics along the Bay of Lalzit(Albania)
Source: Copernicus journal article supplement (doi:10.5194/nhess-2018-113), 2018-05-07
Supplement: Supplementary file [file nhess-2018-113-AC2-supplement.pdf]

Dear Editor,

we would like to thank the reviewers for their effort in reading and commenting the paper. We went through all the comments and we tried to answer in detail to all of them. An item-by-item reply follows for the Reviewer 2 revisions.

## **REVIEWER 2**

*The paper is written clearly and the formulations and methodology are up-to-date, with particular emphasis on the propagation of the wave climate. The figures are of nice quality and results and discussion sections are written clearly. I found the discussion section very enlightening. I only suggest revising the references (i.e. line 7 "Oscar Ferreira").*

We thank the Reviewer for his/her interest in our paper and the comments he/she spend on it; as regards the references, we manually fixed the typos present in the paper due to the automatic settings of the Copernicus package, as the referee suggested.

---
